# Supplementary material for: Control of acute myeloid leukemia by a trifunctional NKp46-CD16a-NK cell engager targeting CD123
Source: PubMed Central journal article supplement (PMC10497414; doi:10.1038/s41587-022-01626-2), 2023-01-12

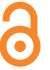

---

# Control of acute myeloid leukemia by a trifunctional NKp46-CD16a-NK cell engager targeting CD123

---

In the format provided by the authors and unedited

## Supplementary information Figure 1

### Molecular design and amino acid sequences of the NK cell engager molecules

- CD123-NKCE : NKp46-Fc-CD123

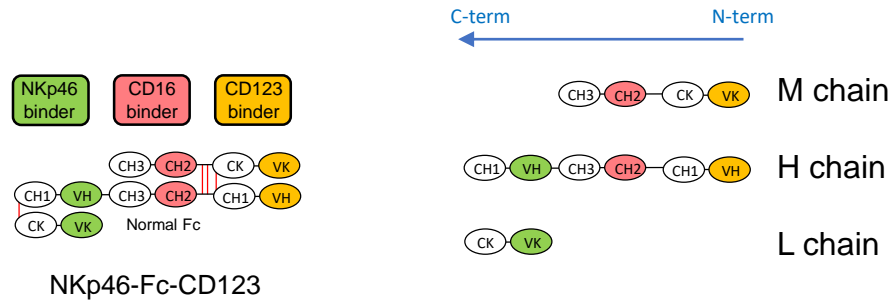

NKCE trifunctional format is constituted by the assembly of three polypeptide chains, namely chain M, H, and L, with respectively the following domain arrangement (ABD\_L)1-CK-H-CH2-CH3, (ABD\_H)1-CH1-H-CH2-CH3-(ABD\_H)2-CH1, and (ABD\_L)1-CK. The antigen binding domains (ABD\_H)1 and (ABD\_L)1 are the antibody heavy and light chain variable domains that bind to the target antigen on cancer cells (orange). (ABD\_H)2 and (ABD\_L)2 are the antibody heavy and light chain variable domains that bind to NKp46 on NK cells (green). CH1, CH2, CH3 and H are the human IgG1 constant domains and hinge. CK is the human kappa light chain constant domain. (Patent N° WO2016207273 and WO2022144836A1)

#### Sequences of mature proteins:

- M chain:

DIVMTQSPDSLAVSLGERATINCESSQSLSSGNQKNYLTWYQQKPGQPPKPLIYWASTRESGVPDRFSGSGSGTDFTLTISSSLQAEDVAVYYCQNDYSYPYTFGQGTKLEIKRTVAAPSVFIFPPSDEQLKSGTASVVCLLNNFYPREAKVQWKVDNALQSGNSQESVTEQDSKDYSLSSSTLTLSKADYEKHKVYACEVTHQGLSSPVTKSFNRGECDKTHTCPPCPAPELLGGPSVFLFPPKPKDTIMISRTPEVTCVVDVSHEDPEVKFNWYVDGVEVHNAKTKPREEQYNSTYRVVSVLTVLHQDWLNGKEYKCKVSNKALPAPIEKTISKAKGQPREPQVYTLPPSREEMTKNQVSLTCLVKGFYPSDIAVEWESNGQPENNYKTTTPVLDSDGSFFLYSKLTVDKSRWQQGNVVFSCSVMEALHNHYTQKSLSLSPGK

- H chain:

EVQLVQSGAEVKKPQGESLKISCKGSGYSFTDYMKWARQMPGKGLEWMDIIPSSGATFYNQKFKGQVTISADKSIISTTYLQWSSLKASDTAMYCARSHLLRASWFAYWGQGMVTVSSASTKGPSVFPLAPSSKSTSGGTAALGCLVKDYFPEPVTVSWNSGALTSQVHTFPAVLQSSGLYSLSSVTVTPSSSLGTQTYICNVNHKPSNTKVDKRVEPKSCDKTHTCPPCPAPELLGGPSVFLFPPKPKDTLMIISRTPEVTCVVDVSHEDPEVKFNWYVDGVEVHNAKTKPREEQYNSTYRVVSVLTVLHQDWLNGKEYKCKVSNKALPAPIEKTISKAKGQPREPQVYTLPPSREEMTKNQVSLTCLVKGFYPSDIAVEWESNGQPENNYKTTTPVLDSDGSFFLYSKLTVDKSRWQQGNVVFSCSVMEALHNHYTQKSLSLSPGSTGTSQVQLVQSGAEVKKPGSSVKVSKASGYTFSDYVINWVRQAPGQGLEWMGEIYPGSGTNYNEKFKAKATITADKSTSTAYMELSSLRSEDYAVYYCARRGRYGLYAMDYWGQGTITVTVSSASTKGPSVFPLAPSSKSTSGGTAALGCLVKDYFPEPVTVSWNSGALTSQVHTFPAVLQSSGLYSLSSVTVTPSSSLGTQTYICNVNHKPSNTKVDKRVEPKSCDKTHS

- L chain:

DIQMTQSPSSLSASVGRVTITCRASQDISNYLNWYQQKPGKAPKLLIYYTSRLHSGVPSRFSGSGSGTDFTFTISSSLQPEDYATYFCQQGNTRPWTFGGGTKVEIKRTVAAPSVFIFPPSDEQLKSGTASVVCLLNNFYPREAKVQWKVDNALQSGNSQESVTEQDSKDYSLSSSTLTLSKADYEKHKVYACEVTHQGLSSPVTKSFNRGEC

## Supplementary information Figure 2

### Molecular design and amino acid sequences of the NK cell engager molecules

- CD123-NKCE : NKp46-Fc null-CD123

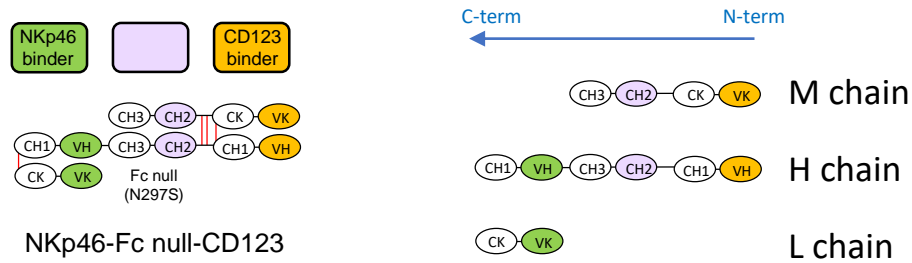

NKCE bifunctional format is constituted by the assembly of three polypeptide chains, namely chain M, H, and L, with respectively the following domain arrangement (ABD\_L)1-CK-H-CH2-CH3, (ABD\_H)1-CH1-H-CH2-CH3-(ABD\_H)2-CH1, and (ABD\_L)1-CK. The antigen binding domains (ABD\_H)1 and (ABD\_L)1 are the antibody heavy and light chain variable domains that bind to the target antigen on cancer cells (orange). (ABD\_H)2 and (ABD\_L)2 are the antibody heavy and light chain variable domains that bind to NKp46 on NK cells (green). CH1, CH2, CH3 and H are the human IgG1 constant domains and hinge. CK is the human kappa light chain constant domain. CH2 domain (pink) was mutated at position 297 (N297S) to inhibit binding to Fc $\gamma$ R<sub>s</sub> (Fc null). (Patent N° WO2016207273 and WO2022144836A1)

#### Sequences of mature proteins:

- M chain:

DIVMTQSPDSLAVSLGERATINCESSQSLSSGNQKNYLTWYQQKPGQPPKPLIYWASTRESGVPDRFSGSGSGTDFTLTISLQAEDVAVYYCQNDYSYPYTFGQGKLEIKRTVAAPSVFIFPPSDEQLKSGTASVVCLLNNFYPREAKVQWKVDNALQSGNSQESVTEQDSKDSTYSLSSTLTLSKADYEKHKVYACEVTHQGLSSPVTKSFNRGECDKTHTCPPCPAPELLGGPSVFLFPPKPKDTIMISRTPEVTCVVDVSHEDPEVKFNWYVDGVEVHNAKTKPREEQ**YS**STYRVVSVLTVLHQDNLGKEYKCKVSNKALPAPIEKTISKAKGQPREPQVYTLPPSREEMTKNQVSLTCLVKGFYPSDIAVEWESNGQPENNYKTTTPVLDSDGSFFLYSKLTVDKSRWQQGNVVFSCSVMHEALHNHYTQKSLSLSPGK

- H chain:

EVQLVQSGAEVKKPGEESLKISCKGSGYSFTDYMKWARQMPGKGLEWMDIIPSSGATFYNQKFKGQVTISADKSIISTTYLQWSSLKASDTAMYCARSHLLRASWFAYWGQGMVTVSSASTKGPSVFPLAPSSKSTSGGTAALGCLVKDYFPEPVTVSWNSGALTSQVHTFPAVLQSSGLYSLSSVTVTPSSSLGTQTYICNVNHKPSNTKVDKRVEPKSCDKTHTCPPCPAPELLGGPSVFLFPPKPKDTLMIISRTPEVTCVVDVSHEDPEVKFNWYVDGVEVHNAKTKPREEQ**YS**STYRVVSVLTVLHQDNLGKEYKCKVSNKALPAPIEKTISKAKGQPREPQVYTLPPSREEMTKNQVSLTCLVKGFYPSDIAVEWESNGQPENNYKTTTPVLDSDGSFFLYSKLTVDKSRWQQGNVVFSCSVMHEALHNHYTQKSLSLSPGSTGTSQVQLVQSGAEVKKPGSSVKVSKASGYTFSDYVINWVRQAPGQGLEWMGEIYPGSGTNYNEKFKAKATITADKSTSTAYMELSSLRSEDYAVYYCARRGRYGLYAMDYWGQGTITVTVSSASTKGPSVFPLAPSSKSTSGGTAALGCLVKDYFPEPVTVSWNSGALTSQVHTFPAVLQSSGLYSLSSVTVTPSSSLGTQTYICNVNHKPSNTKVDKRVEPKSCDKTHS

- L chain:

DIQMTQSPSSLSASVGRVTITCRASQDISNYLNWYQQKPGKAPKLLIYYTSRLHSGVPSRFSGSGSGTDFTFTISLQPEDYATYFCQQGNTRPWTFGGGTKVEIKRTVAAPSVFIFPPSDEQIKSGTASVVCLLNNFYPREAKVQWKVDNALQSGNSQESVTEQDSKDSTYSLSSTLTLSKADYEKHKVYACEVTHQGLSSPVTKSFNRGEC

N297S mutation is shown in bold font

### Supplementary information Figure 3

NK-cell activation assay with MOLM-13 AML cell line / NK-cell gating strategy and analysis

**NK cells:** Time Gate / Single cells (SSC-A SSC-W) / Living cells (livedead negative) / Leucocytes (CD45+)/ CD3- / CD56+

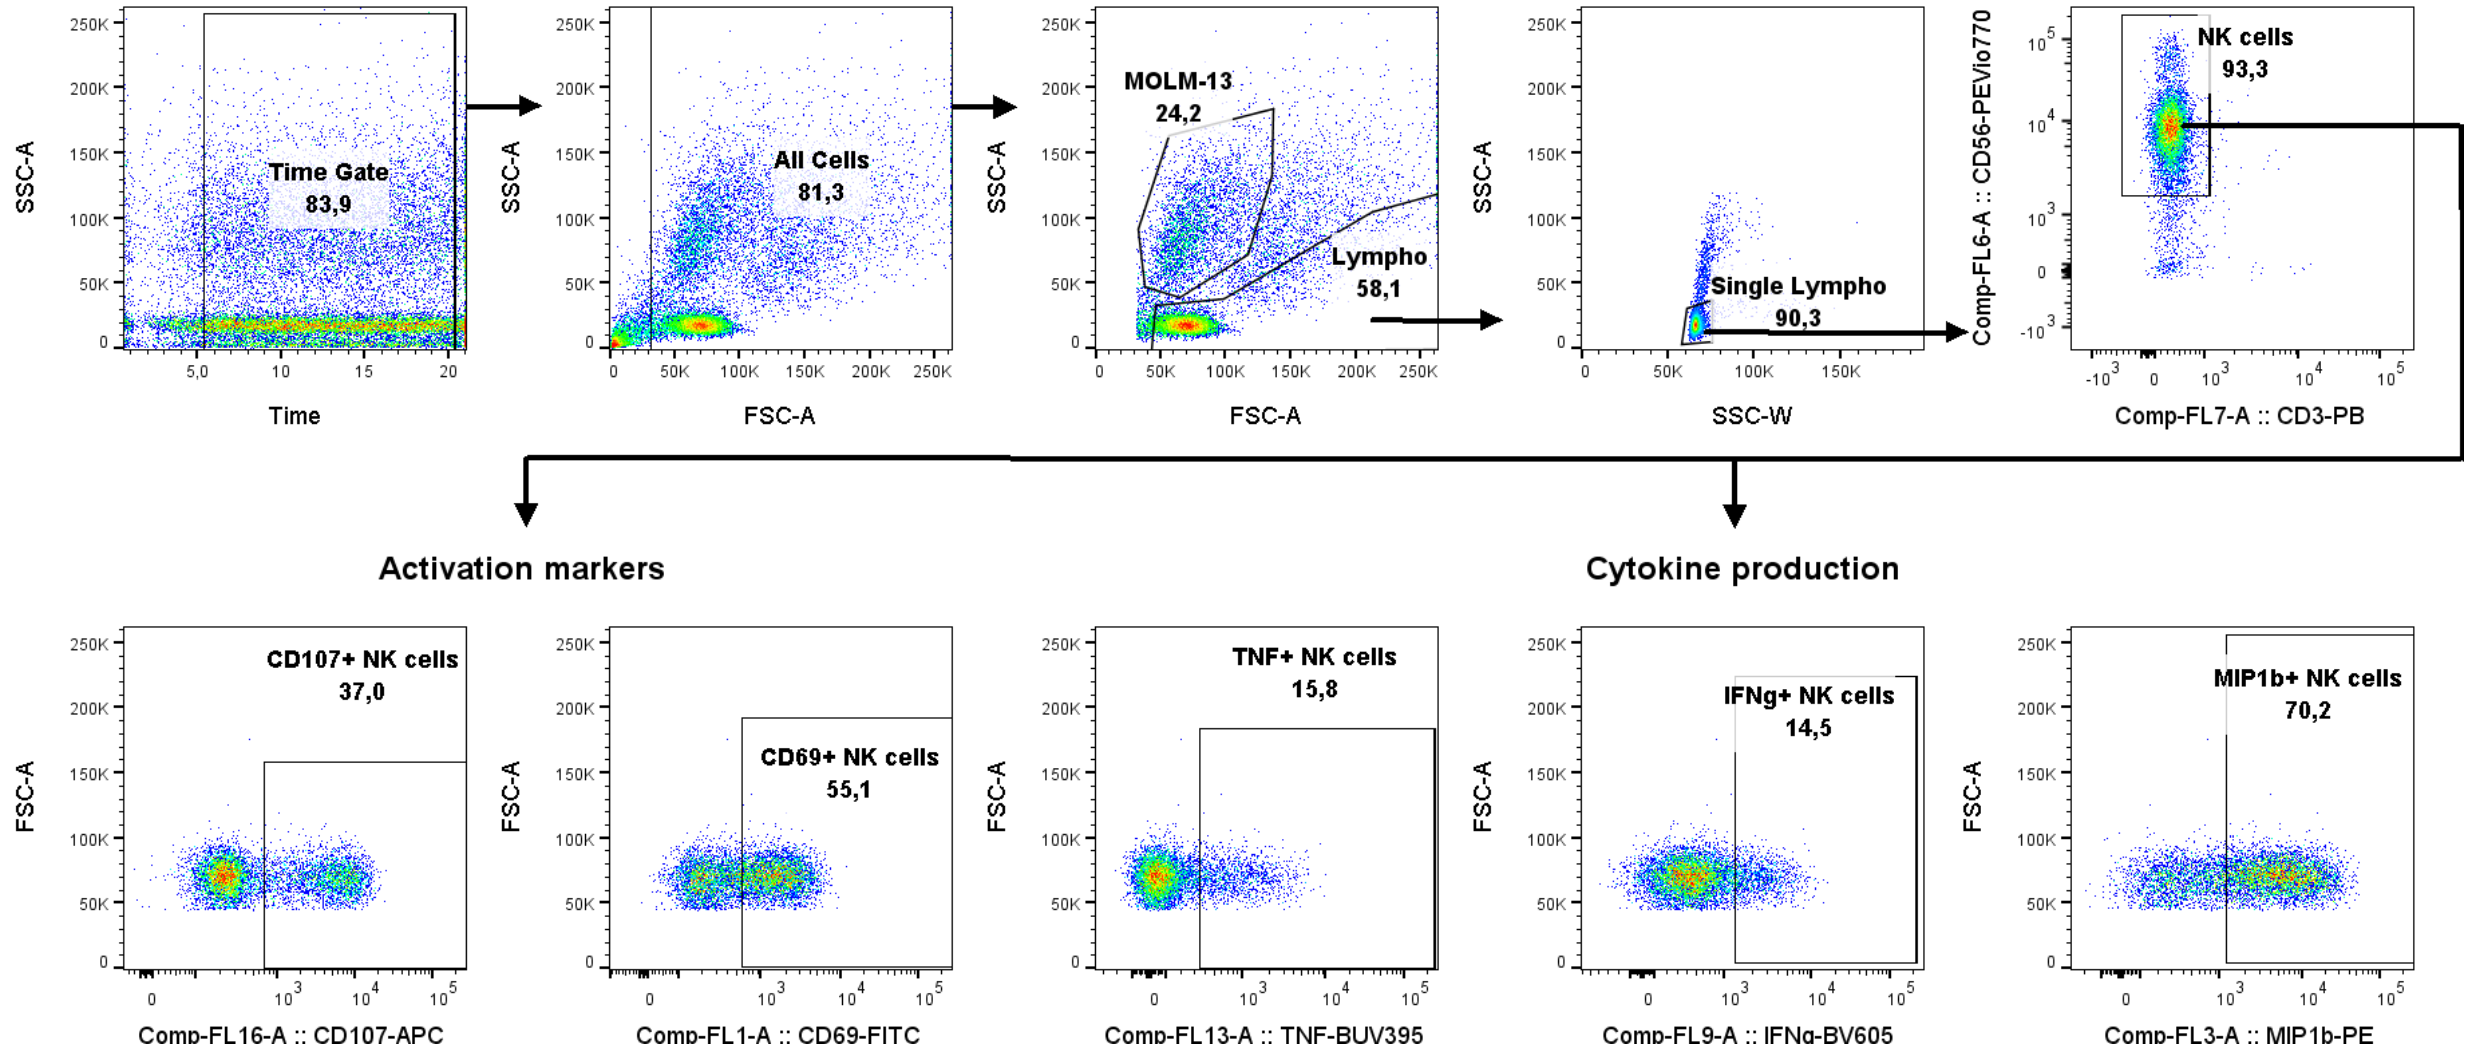

Results for NK cells + MOLM-13 treated with CD123-NKCE at 1.5  $\mu$ g/mL are shown for one healthy donor

## Supplementary information Figure 4

Depletion of CD123<sup>+</sup> normal immune cells in Healthy Donor PBMCs treated overnight with CD123-NKCE

### Gating strategy for basophils in human PBMC

#### Basophil gating strategy:

- FSC/SSC ; single cells; viable cells
- TCR<sup>-</sup> / HLA-DR<sup>-</sup> CD14<sup>-</sup> / IgE<sup>+</sup>(/CD203c<sup>+</sup>)

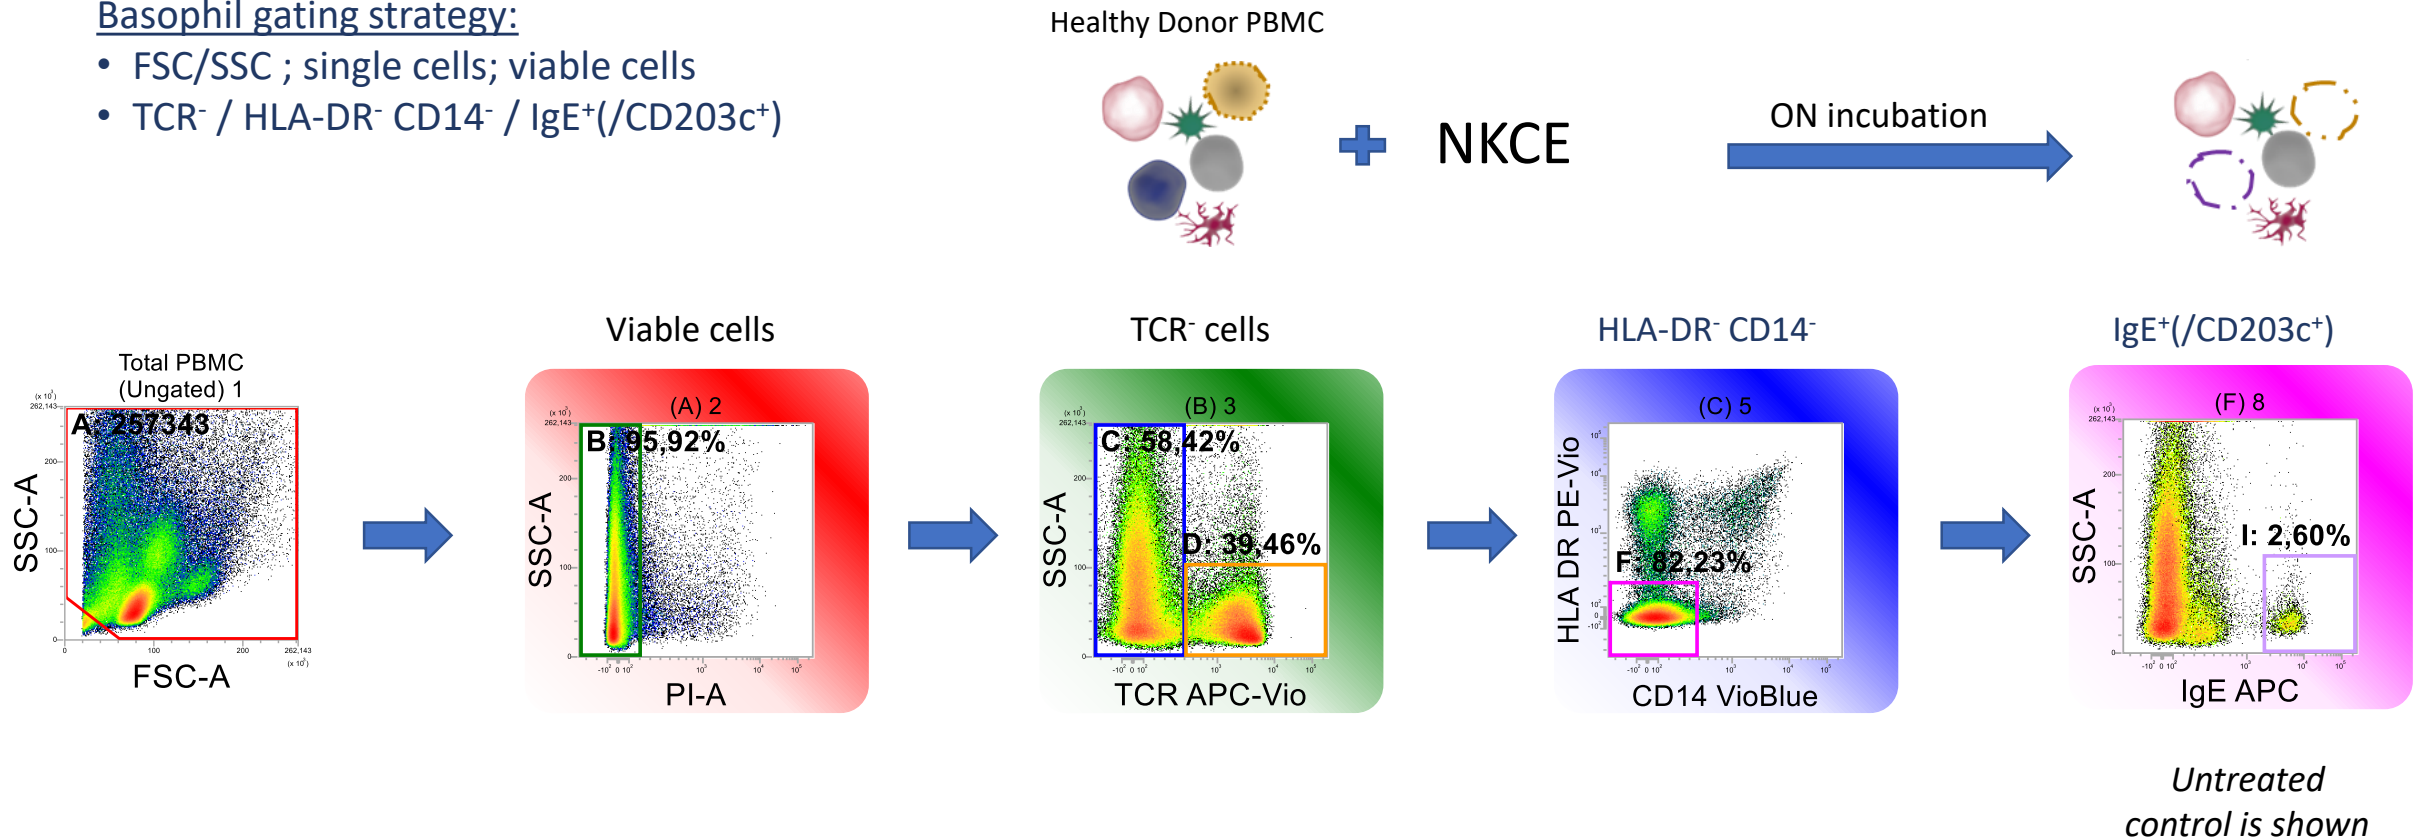

## Supplementary information Figure 5

### Basophil and CD123-positive cell gating strategy in non human primate

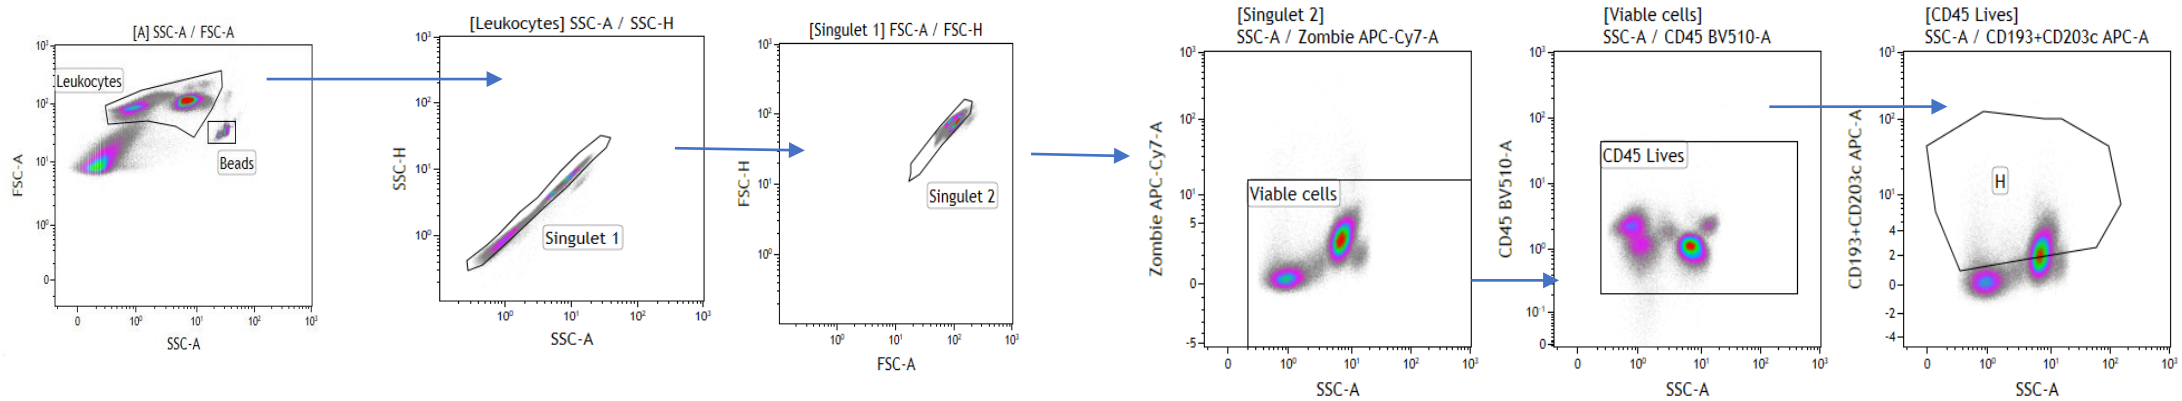

#### Basophils gating strategy:

- FSC/SSC ; single cells; viable cells
- CD45<sup>+</sup>
- CD193<sup>+</sup>/CD203c<sup>+</sup>
- IgE<sup>+</sup> (i.e. FcεRI<sup>+</sup>)

#### Total CD123<sup>+</sup> cells gating strategy:

- FSC/SSC ; single cells; viable cells
- CD123

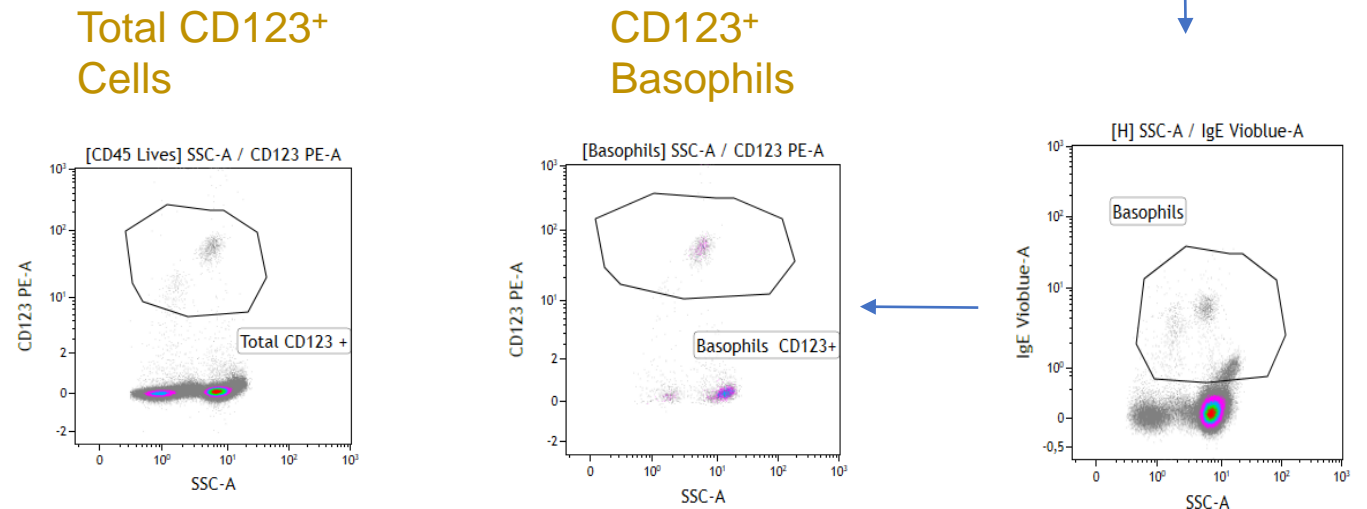

Supplement: 41587_2022_1626_MOESM1_ESM.pdf [file 41587_2022_1626_MOESM1_ESM.pdf]
